# Supplementary material
Source: PubMed Central journal article supplement (PMC2922259)
Supplement: 1006138107_Appendix.pdf [file 1006138107_Appendix.pdf]

**Supplementary Information**

**Combining metabolic and protein engineering of a  
terpenoid biosynthetic pathway for overproduction and  
selectivity control**

Effendi Leonard, Parayil Kumaran Ajikumar, Kelly Thayer, Wen-Hai Xiao,

Jeffrey D. Mo, Bruce Tidor, Gregory Stephanopoulos,

Kristala L. J. Prather

**Supplementary Table 1. Diterpenoid production (mg/L) from *E. coli* expressing wild-type GGPPS and LPS, with variable overexpression of genes in the MEP pathway as operons *dxs*, *idi*, *ispD*, and *ispF* (encoding for 1-deoxy-D-xylulose-5-phosphate synthase, isopentenyl diphosphate isomerase, 2-C-methyl-D-erythritol 4-phosphate cytidyltransferase, and 2-C-methyl-D-erythritol 2,4-cyclodiphosphate synthase, respectively).**

| <b>Upstream pathway overexpression</b> | <b>Copy number of <i>dxs</i>, <i>idi</i>, <i>ispD</i>, <i>ispF</i> operon</b> | <b>Total diterpenoid titer (mg/L)</b> | <b>Fold improvement</b> |
|----------------------------------------|-------------------------------------------------------------------------------|---------------------------------------|-------------------------|
| Wild type                              | 0                                                                             | 0.15                                  | 1                       |
| Ch1TrcMEP                              | 1                                                                             | 0.63                                  | 4.2                     |
| p5TrcMEP                               | ~5                                                                            | 91.70                                 | 611.33                  |
| p10TrcMEP                              | ~10                                                                           | 26.53                                 | 176.87                  |

In addition to the native copy of the enzymes, additional copies of the genes were contained in the strains as operon *dxs-idi-ispD-ispF* under a Trc promoter. The single copy MEP strain was constructed by chromosomal localization of the MEP pathway and higher copy numbers were achieved through plasmid-based expression. Quantification of production was determined based on sampling an average of three independent *E. coli* colonies harboring the mutated pathway. Standard deviations were lower than 5%. Cell density ( $A_{600}$ ) in all samples was  $5 \pm 0.5$ .

**Supplementary Table 2. Diterpenoid production from precursor-amplified *E. coli* strains harboring GGPPS and LPS mutants (phylogenetically-based mutations)**

| LPS mutation | Titer (mg/L) |
|--------------|--------------|
| WT           | 26.5         |
| M593I        | 98.6         |
| C618N        | 4.0          |
| L619F        | 12.7         |
| A620T        | 33.9         |
| L696Q        | 42.0         |
| Y700H        | 11.5         |
| K723S        | 48.0         |
| A727S        | 0.0          |
| A729G        | 0.6          |
| V731L        | 2.3          |
| N769A        | 0.0          |
| E777A        | 0.0          |
| N838E        | 58.5         |
| G854T        | 36.8         |
| I855L        | 17.7         |

WT, wild type LPS.

Quantification of production was determined based on sampling an average of three independent *E. coli* colonies harboring the mutated pathway. Standard deviations were lower than 5%. Cell density ( $A_{600}$ ) in all samples was  $5 \pm 0.5$ .

**Supplementary Table 3. Diterpenoid production from precursor-amplified *E. coli* strains harboring GGPPS and LPS mutants (saturation mutagenesis of Met593)**

| LPS Met593 mutation | Product Selectivity (%) |    |     | Titer (mg/L) |
|---------------------|-------------------------|----|-----|--------------|
|                     | 1                       | 2  | 3   |              |
| WT                  | 87                      | 11 | 2   | 26.5         |
| Ala                 | 65                      | 26 | 9   | 16.2         |
| Cys                 | 65                      | 28 | 7   | 48.4         |
| Asp                 | 51                      | 15 | 34  | 10.3         |
| Glu                 | 30                      | 7  | 63  | 9.7          |
| Phe                 | ND                      | ND | 100 | 3.8          |
| Gly                 | 67                      | 23 | 10  | 1.3          |
| His                 | ND                      | ND | ND  | 0.0          |
| Ile                 | 84                      | 12 | 5   | 98.6         |
| Lys                 | ND                      | ND | ND  | 0.0          |
| Leu                 | 80                      | 13 | 7   | 55.2         |
| Asn                 | 75                      | 11 | 14  | 40.4         |
| Pro                 | 49                      | 8  | 43  | 12.6         |
| Gln                 | 43                      | TA | 57  | 8.6          |
| Arg                 | TA                      | ND | 100 | 4.6          |
| Ser                 | 80                      | 11 | 9   | 39.8         |
| Thr                 | 78                      | 16 | 6   | 40.2         |
| Val                 | 71                      | 22 | 6   | 18.2         |
| Trp                 | ND                      | ND | ND  | 0.0          |
| Tyr                 | ND                      | ND | ND  | 0.0          |

WT, wild type LPS; TA, trace amounts (< 0.1%); ND, not detected.

Levopimaradiene, 1; abietadiene, 2; sandaracopimaradiene, 3. Neoabietadiene is not included in the table because it was only produced in trace amounts in all strains.

Quantification of production was determined based on sampling an average of three independent *E. coli* colonies harboring the mutated pathway. Standard deviations were lower than 5%. Cell density ( $A_{600}$ ) in all samples was  $5 \pm 0.5$ .

**Supplementary Table 4. Diterpenoid production from precursor-amplified *E. coli* strains harboring GGPPS and LPS mutants (saturation mutagenesis of Tyr700)**

| LPS Tyr700 mutation | Product Selectivity (%) |    |     | Titer (mg/L) |
|---------------------|-------------------------|----|-----|--------------|
|                     | 1                       | 2  | 3   |              |
| WT                  | 87                      | 11 | 2   | 26.5         |
| Ala                 | 81                      | 9  | 10  | 75.6         |
| Cys                 | 76                      | 7  | 17  | 59.1         |
| Asp                 | 81                      | ND | 19  | 13.3         |
| Glu                 | 64                      | 7  | 29  | 46.3         |
| Phe                 | 79                      | 16 | 5   | 133.5        |
| Gly                 | 79                      | 6  | 15  | 36.1         |
| His                 | 74                      | ND | 26  | 6.2          |
| Ile                 | 60                      | 6  | 34  | 31.5         |
| Lys                 | TA                      | ND | 100 | 4.3          |
| Leu                 | 72                      | 7  | 21  | 48.2         |
| Met                 | 80                      | 13 | 7   | 132.8        |
| Asn                 | 70                      | 9  | 21  | 60.2         |
| Pro                 | 56                      | ND | 44  | 8.3          |
| Gln                 | 59                      | 6  | 35  | 41.2         |
| Arg                 | 33                      | ND | 67  | 5.0          |
| Ser                 | 78                      | 7  | 15  | 84.9         |
| Thr                 | 72                      | 7  | 21  | 65.4         |
| Val                 | 56                      | 6  | 38  | 31.3         |
| Trp                 | 84                      | 6  | 10  | 100.7        |

WT, wild type LPS; TA, trace amounts (< 0.1%); ND, not detected.

Levopimaradiene, 1; abietadiene, 2; sandaracopimaradiene, 3. Neoabietadiene is not included in the table because it was only produced in trace amounts in all strains.

Quantification of production was determined based on sampling an average of three independent *E. coli* colonies harboring the mutated pathway. Standard deviations were lower than 5%. Cell density ( $A_{600}$ ) in all samples was  $5 \pm 0.5$ .

**Supplementary Table 5. Diterpenoid production from precursor-amplified *E. coli* strains harboring GGPPS and LPS mutants (saturation mutagenesis of Ala620)**

| LPS Ala620 mutation | Product Selectivity (%) |    |    | Titer (mg/L) |
|---------------------|-------------------------|----|----|--------------|
|                     | 1                       | 2  | 3  |              |
| WT                  | 87                      | 11 | 2  | 26.5         |
| Cys                 | 87                      | 10 | 3  | 40.0         |
| Asp                 | 97                      | 2  | 1  | 1.7          |
| Glu                 | ND                      | ND | ND | 0.0          |
| Phe                 | ND                      | ND | ND | 0.0          |
| Gly                 | 86                      | 12 | 2  | 29.2         |
| His                 | 100                     | ND | ND | 0.9          |
| Ile                 | ND                      | ND | ND | 0.0          |
| Lys                 | ND                      | ND | ND | 0.0          |
| Leu                 | 97                      | 2  | 1  | 7.3          |
| Met                 | ND                      | ND | ND | 0.0          |
| Asn                 | 97                      | 2  | 1  | 2.6          |
| Pro                 | ND                      | ND | ND | 0.0          |
| Gln                 | ND                      | ND | ND | 0.0          |
| Arg                 | ND                      | ND | ND | 0.0          |
| Ser                 | 92                      | 8  | TA | 42.2         |
| Thr                 | 87                      | 11 | 2  | 33.9         |
| Val                 | 92                      | 8  | TA | 42.5         |
| Trp                 | ND                      | ND | ND | 0.0          |
| Tyr                 | ND                      | ND | ND | 0.0          |

WT, wild type LPS; TA, trace amounts (< 0.1%); ND, not detected.

Levopimaradiene, 1; abietadiene, 2; sandaracopimaradiene, 3. Neoabietadiene is not included in the table because it was only produced in trace amounts in all strains.

Quantification of production was determined based on sampling an average of three independent *E. coli* colonies harboring the mutated pathway. Standard deviations were lower than 5%. Cell density ( $A_{600}$ ) in all samples was  $5 \pm 0.5$ .

**Supplementary Table 6. Diterpenoid production from precursor-amplified *E. coli* strains harboring GGPPS and LPS M593I mutants (saturation mutagenesis of Tyr700)**

| LPS (M593I)<br>Tyr700<br>mutation | Product Selectivity (%) |    |    | Titer (mg/L) |
|-----------------------------------|-------------------------|----|----|--------------|
|                                   | 1                       | 2  | 3  |              |
| WT                                | 87                      | 11 | 2  | 26.5         |
| Ala                               | 91                      | 2  | 7  | 167.8        |
| Cys                               | 97                      | 1  | 2  | 155.7        |
| Asp                               | 85                      | TA | 15 | 66.1         |
| Glu                               | 60                      | TA | 40 | 92.4         |
| Phe                               | 85                      | 9  | 6  | 273.8        |
| Gly                               | 80                      | TA | 20 | 59.2         |
| His                               | 70                      | TA | 30 | 63.8         |
| Ile                               | 65                      | TA | 35 | 78.6         |
| Lys                               | ND                      | ND | ND | 0.0          |
| Leu                               | 73                      | 2  | 25 | 97.4         |
| Met                               | 89                      | 2  | 9  | 132.1        |
| Asn                               | 79                      | TA | 21 | 93.7         |
| Pro                               | 0                       | TA | ND | 0.0          |
| Gln                               | 60                      | TA | 40 | 26.9         |
| Arg                               | ND                      | ND | ND | 0.0          |
| Ser                               | 84                      | TA | 16 | 48.1         |
| Thr                               | 73                      | TA | 27 | 22.7         |
| Val                               | 91                      | TA | 9  | 83.5         |
| Trp                               | 63                      | TA | 37 | 51.6         |

WT, wild-type LPS; TA, trace amounts (< 0.1%); ND, not detected.

Levopimaradiene, 1; abietadiene, 2; sandaracopimaradiene, 3. Neoabietadiene is not included in the table because it was only produced in trace amounts in all strains.

Quantification of production was determined based on sampling an average of three independent *E. coli* colonies harboring the mutated pathway. Standard deviations were lower than 5%. Cell density ( $A_{600}$ ) in all samples was  $5 \pm 0.5$ .

**Supplementary Table 7. Diterpenoid production from precursor-amplified *E. coli* strains harboring isolated GGPPS mutants and the LPS M593I/Y700F variant**

| GGPPS mutation | Titer (mg/L) |
|----------------|--------------|
| WT             | 273.8        |
| G1             | 261.3        |
| G2             | 396.2        |
| G3             | 343.2        |
| G4             | 316.8        |
| G5             | 257.1        |
| G6             | 242.4        |
| G7             | 380.9        |
| G8             | 351.0        |
| G9             | 350.7        |
| G10            | 468.7        |
| G11            | 211.8        |
| G12            | 366.8        |
| G13            | 411.1        |
| G14            | 287.2        |
| G15            | 406.7        |

WT, wild type GGPPS.

Quantification of production was determined based on sampling an average of three independent *E. coli* colonies harboring the mutated pathway. Product selectivity of all mutant pathways remained similar (within  $\pm 1\%$ ) to the pathway harboring wild-type GGPPS and LPS(M593I/Y700F). Standard deviations were lower than 5%. Cell density ( $A_{600}$ ) in all samples was  $5 \pm 0.5$ .



Supplementary Figure 1. GC-MS chromatogram of diterpenoid products from the engineered *E. coli* strain.

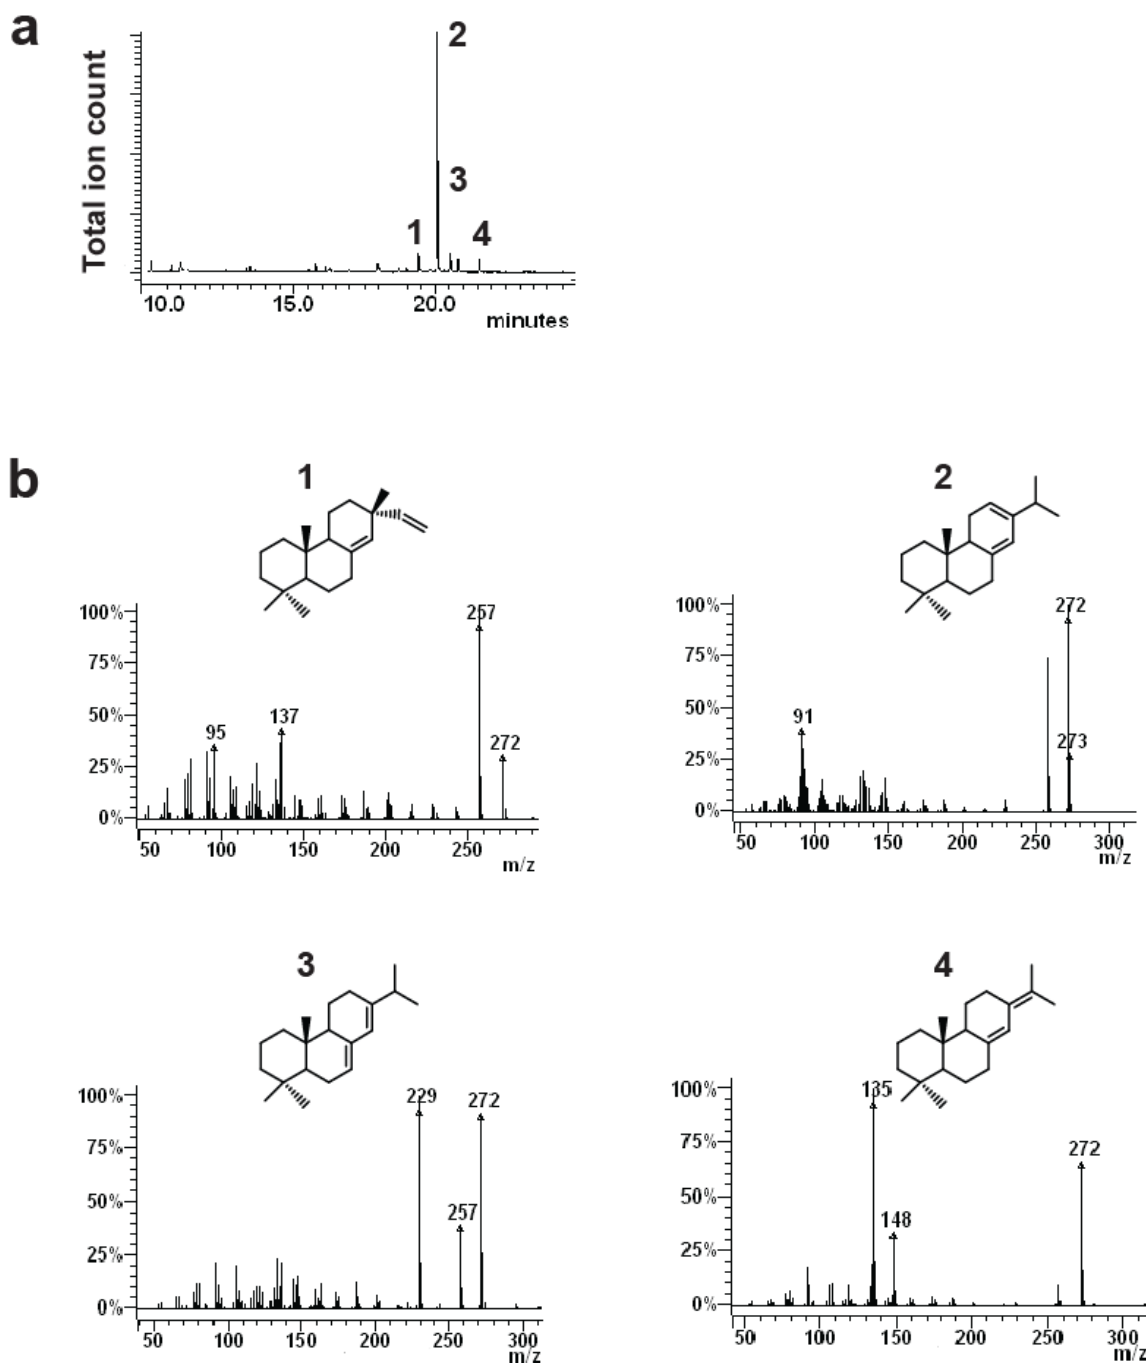

**(a)** Total ion chromatogram and retention time of the diterpenoids secreted in the culture media used to cultivate the pre-engineered *E. coli* strain expressing the wild type GGPPS and LPS. **(b)** GC-MS spectra of the product peaks corresponding to sandracopimaradiene (1), levopimaradiene (2), abietadiene (3), and neobietadiene (4) as previously reported in literatures(1, 2).

## Supplementary Figure 2. Probing putative LPS binding pocket.

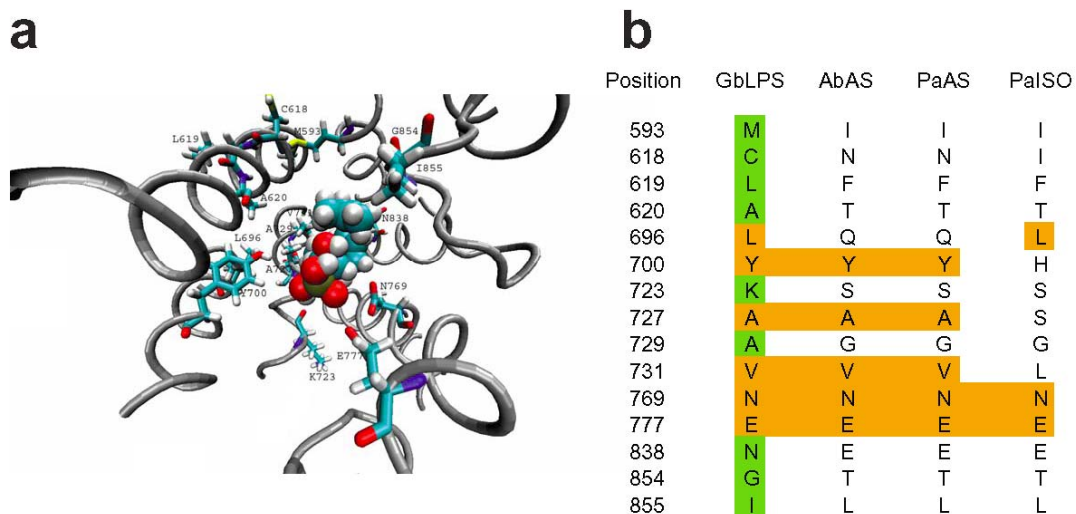

(a) The homology structural model for LPS second active site. Fifteen residues within 10 Å which were targeted for phylogenetic-based mutational analysis are shown. The substrate in the binding pocket is farnesyl hydroxyphosphonate. (b) Comparison of selected residues in *G. biloba* LPS (GbLPS) with those in *A. grandis* and *P. abies* abietadiene synthase (AbAS and PaAS), and *P. abies* isopimaradiene synthase (PalSO). Highlighted in green are residues in GbLPS that are different from all of the three paralogous enzymes. Highlighted in orange are residues in GbLPS found in any one of the paralogous enzymes.

**Supplementary Figure 3. Amino acid alignment of *Sinapis alba* GGPPS (SaGGPPS) and *Taxus Canadensis* GGPPS (TcGGPPS).**

```

SaGGPPS   (1)  -----MASSVTP LGSVLLHHHPSTILTQSRSRSPPS-----
TcGGPPS   (1)  MAYTAMAAGTQSLQLRRTVASYQECNSMRSCFKLTPFKSFHGVNFNVPSLG

SaGGPPS   (33) -----LITLKPI SLTPKRTVSSSS-----SSSLITKE DNNLKSSSSSFD
TcGGPPS   (51) AANCEIMGHLKLGSLPYKQCSVSSKSTKTMAQLVDLAE ETEKAEGKDIEFD

SaGGPPS   (72)  FMSYIIRKADSVNKA LDSAVPLREPLKIHEAMRYSLLAGGKVRPVLCIA
TcGGPPS   (101) FNEYMKS KAVAVDAALDKAIPLEYPEKIHESMRYSLLAGGKVRPALCIA

SaGGPPS   (122) ACELVGGEESLAMPARCAVEMIHTMSLIHDDLPCMDNDDLRRGKPTNHKV
TcGGPPS   (151) ACELVGGSQDLAMPTACAVEMIHTMSLIHDDLPCMDNDDFRRGKPTNHKV

SaGGPPS   (172) YGEDVAVLAGDALLSFAFEHLASATSSEVSPARVVRAVGE LAKAIGTEGL
TcGGPPS   (201) FGEDTAVLAGDALLSFAFEHIAVATSKTVPSDRTLRVIS ELGKTIGSQGL

SaGGPPS   (222) VAGQVVDISSEGLDLNNVGL EHLKF IHLHKTAALLEASAVLGGI IGGGSD
TcGGPPS   (251) VGGQVVDITSEG--DANVDLKTLEW IHIHKTAVLL ECSVVSGGILGGATE

SaGGPPS   (272) EEIERLRKFA RCIGLLFQVVDILDVTKSSQELGKTAGKDLIADKLTYPK
TcGGPPS   (299) DEIARIRRYARCVGLLFQVVDILDVTKSSEELGKTAGKDLLTDKATYPK

SaGGPPS   (322) LMGLEKSREFAEKLNTEARDQLLGFDSK VAPLLALANYIANRQN
TcGGPPS   (349) LMGLEKAKEFAEELATRAKEELSSFDQIKAAPLLGLADYIAFRQN

```

Highlighted in green are homologous residues.

**Supplementary Figure 4. Location and identification of mutations carried by the isolated *ggpps* variants.**

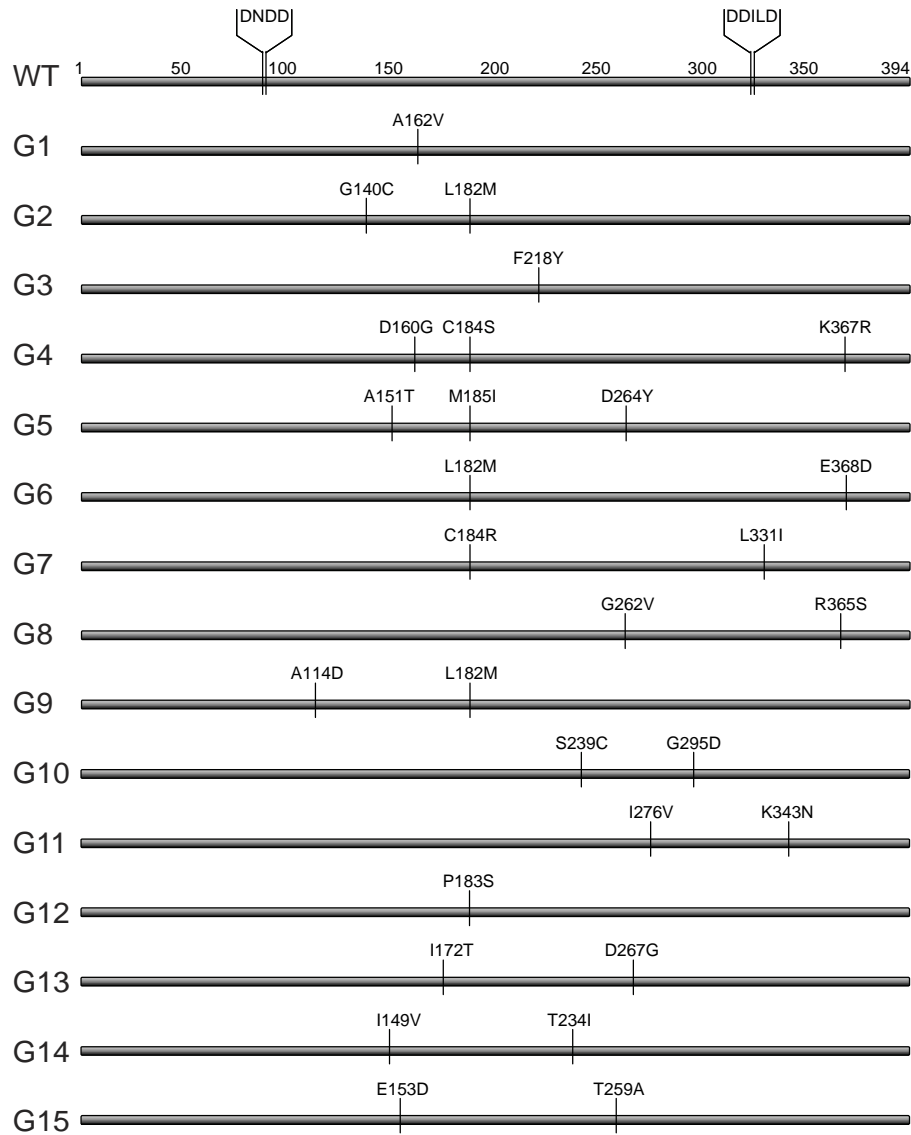

### Supplementary Figure 5. Amino acid alignment of EAS(3) and LPS(4).

```

EAS      (1) -----
LPS      (1) MAGVLFANLPCSLQLSPKVPFRQSTNILIPFHKRSSFGFNAQHCVRSHLR

EAS      (1) -----
LPS      (51) LRWNCVGIHASAAETRPDQLPQEERFVSRLNADYHPAVWKDDFIDSLSLTP

EAS      (1) -----
LPS      (101) NSHATSKSSVDETINKRIQTLVKEIQCMFQSMGDGETNPSAYDTAWVARI

EAS      (1) -----
LPS      (151) PSIDGSGAPQFPQTLQWILNNQLPDGSWGEECIFLAYDRVLNTLACLTL

EAS      (1) -----
LPS      (201) KIWNKGDIQVQKGVFVRKHMEEMKDEADNHRPSGFVVFPAAMLDEAKSL

EAS      (1) -----
LPS      (251) GLDLPYHLPFISQIHQKRQKQLKQIPLNVLHNHQTALLYSLLEGLQDVVDW

EAS      (46) QEIEALKEQTRSMLLATG-----RK-----
LPS      (301) QEITNLQSRDGSFLSSPASTACVFMHTQNKRCLEHFLNFVLSKFGDYVPCH

EAS      (66) ----LADTLNLDIIEERLGISYHFEKEIDEILDQIYN-----QN--
LPS      (351) YPLDLFERLWAVDTVERLGIDRYFKKEIKESLDYVYRYWDAERGVDGWARC

EAS      (101) SNCNDLCTSALQFRLLRQHGFNISPEIFSKFQDENG--K-FKESLASDVL
LPS      (401) NPIDVDVDDTAMGLRILRLHGYNVSSDVLENFRDEKGDFFCFAGQTQIGVT

EAS      (148) GLLNLYEASHVRTHADDILEDALAFSTIHLESAAPH-----LKSPLR
LPS      (451) DNLNLYRCSQVCFPGEKIMEEAKTFTTNHLQNALAKNNAFDKWAVKCDLP

EAS      (190) EQVTHALEQCLHKGVPVTRFFISSIYDKEQSK-----NNVLL
LPS      (501) GEVEYAIKYPWHRSMRLEARSYIEQFGSNDVWLGKTVYKMLYVSNEKYL

EAS      (229) RFAKLDFNLLQMLHKQELAQVSRWWKDLDFVTTLPYARDRVVECYFWALG
LPS      (551) ELAKLDFNMVQALHQKETQHIVSWWRESGFN-DLTFTRQRPVEMYFSVAV

EAS      (279) VYFEPQYSQARVMLVKTISMISIVDDTDFDAYGTVKELEAYTDAIQRWDIN
LPS      (600) SMFEPEFAACRIAYAKTSCLAVIDDDLYDTHGSLDDLKLFSEAVRRWDIS

EAS      (329) EIDRLPD-YMKISYKAILDLYKDYEKELSSAGRSHIVCHAIERMKEVVRN
LPS      (650) VLDSVRDNQLKVCFLGLYNTVNGFGKDGLKEQGRDVLGYLRKVVWEGLLAS

EAS      (378) YNVESTWFIEGYMPPVSEYLSNALATTTYYLATTSYLG-MKSATEQDFE
LPS      (700) YTKEAEWSAAKYVPTFNEYVENAKVSIALATVVLNSIFFTGELLDPDYILQ

EAS      (427) WLSKNPKILEASVIIICRVIDDTATYEVEKSRGIATGIECCMRDYG-IST
LPS      (750) QVDLRSKFLHLVSLTGRLINDTKTYQAERNRGLVSSVQCYMRENPECTE

EAS      (476) KEAMAKFQNMMAETAWKDINEGLLRPTPVSTEFLLTPILNLARIVEVTYIHN
LPS      (800) EEALSHVYGIIDNALKELNWELANPASNAPLCVRRLLFNNTARVMQLFYMY

EAS      (526) LDGYTHPEKVLKPHIINLLVDSIKI
LPS      (850) RDGFGISDKEMKDHVSRTLFDPA-

```

## Methods

**Cloning and pathway construction.** The sequences of *ggpps* (5) and *lps*(4) were obtained from *Taxus canadensis* and *Gingko biloba*, respectively (Genbank accession codes: AF081514 and AF331704). We chose *T. canadensis* GGPPS as the upstream enzyme of LPS because this enzyme has high specificity toward FPP to synthesize GGPP, the diterpenoid substrate (5). Genes were custom-synthesized (DNA 2.0) to incorporate *E. coli* codon bias, remove restriction sites for cloning purposes, and establish a ~50% GC-content. Nucleotides corresponding to the 98 N-terminal amino acids of GGPPS (plastid transit peptide) were removed by designing custom oligonucleotides to generate mature proteins as previously described (5). In the case of LPS, truncation of 40 N-terminal amino acids was chosen because its incorporation into the levopimaradiene pathway gave rise to the most stable diterpenoid production in comparison to 60- and 80-amino acid truncations. In all cases, a start codon was introduced in the truncated gene fragments. For creating mutagenesis templates and sequencing purposes, *ggpps* and *lps* were individually cloned into pTrc99A (GE Healthcare) into the HindIII–EcoRI and EcoRI–Sall restriction sites, respectively.

The levopimaradiene pathways (wild type and mutants) were constructed by cloning PCR fragments of *ggpps* and *lps* into the HindIII–EcoRI and EcoRI–Sall sites of pTrcMod (6) to create pTrcGGPPS-LPS. To allow high throughput screening of GGPPS mutants, the biosynthetic gene cluster consisting of *crtB* and *crtI* derived from plasmid pAC-LYC (7) were cloned into the EcoRI – Sall

sites of pTrcMod to yield pTrcCRT. The mutant *ggpps* library was subsequently cloned into pTrcCRT in between the HindIII and EcoRI sites to create pTrcGGPPS\*-CRT. In all cases, *E. coli* MG1655  $\Delta$ (*endA*, *recA*) overexpressing the MEP pathway was used as the expression strain of the various pathways (wild-type and mutant levopimaradiene pathways, wild-type and mutant lycopene pathways).

**Construction of the MEP pathway (*dxs-idi-ispDF* operon).** The *dxs-idi-ispDF* operon was initially constructed by cloning each of the genes from the genome of *E. coli* K12 MG1655 into the pET21C+ plasmid with a T7 promoter (p20T7MEP). Using the primers *dxsidiispDFNcoI*(s) and *dxsidiispDFKpnI*(a) (SI Table 8), the *dxs-idi-ispDF* operon was sub-cloned into the pTrcMod plasmid after being digested with NcoI and KpnI restriction enzymes for the construction of p20TrcMEP. The p20TrcMEP plasmid was digested with MluI and PmeI and cloned into MluI and PmeI digested pACYC184-melA(P2A) plasmid to construct p10TrcMEP plasmid. For the construction of pACYC184-melA(P2A) plasmid, *lacI-Ptrc-melA* was amplified from pTrcmelAmut1(8) using the primers CS173blacIqEagI(s) and CS174brnBBamHI(a). Then the PCR product and pACYC184 were digested with EagI and BamHI and ligated together. The p20TrcMEP plasmid was digested with BstZ17I and Scal and cloned into PvuII digested pCL1920 plasmid to construct p5TrcMEP plasmid (9, 10).

To construct plasmids with the FRP-Km-FRP cassette used for amplifying the subsequent sequence for chromosomal localization of the pathway, the FRP-Km-FRP cassette was amplified from the pkD13 plasmid using the

KmFRPSacI(s) and KmFRPScal(a) primers. This fragments was inserted into the p20TrcMEP plasmid was digested with SacI/Scal (p20TrcMEPKm-FRP).

The MEP pathways constructed under the promoter Trc were localized to the arabinose operon region in the *E. coli* chromosome with the Kan marker. The PCR fragments were amplified from p20T7MEPKmFRP, using the primers IntTrc(s) and Int(a) and then electroporated into *E. coli* MG1655  $\Delta$  (*endA*, *recA*) for chromosomal integration through the  $\lambda$ -Red recombination technique(11). The site specific localization was confirmed by PCR after successful gene integration.

#### **Cultivation of engineered strains in 15 mL culture tube and 3-L bioreactor.**

Single transformants of pre-engineered *E. coli* strains expressing pTrcGGPPS-LPS or their mutant variants were cultivated for 18 h at 30°C in LB medium. For library characterization, these preinnocula were used to seed fresh 2-mL cultures in 15-mL vented tubes at a starting  $A_{600}$  of 0.1. The medium was composed of yeast extract, 5 g/L; Trypton, 10 g/L; glycerol, 15 g/L; NaCl, 10 g/L; HEPES, 100 mM; 3 ml 50% antifoam B. pH was adjusted to 7.6. Cultures were grown for 120 h at 22°C prior to diterpenoid analysis.

Scale-up experiments (1-L cultures) were done in 3-L bioreactors using the same culture medium except that glycerol was initially supplied at 10 g/L. During the fermentation, 3 g/L glycerol was added to the bioreactor when the concentration was observed to fall to 0.5 – 1 g/L. The aeration level was set to 0.5 vvm, and dissolved oxygen level was controlled at more than 20% during the course of fermentation by increasing agitation speed. All cultures were supplemented with 100  $\mu$ g/mL ampicillin and 34  $\mu$ g/mL chloramphenicol. To



minimize the loss of diterpenoids due to air-stripping, 20% dodecane was added into the culture.

**GC-MS analysis of diterpenoids.** For analysis of small-scale cultivations (libraries), 1 mL hexane was added into 1.5 mL culture aliquots and vortexed for 30 min. The mixture was centrifuged to separate the organic layer. For analysis of bioreactor cultivations, 1  $\mu$ L of the dodecane layer was diluted to 200  $\mu$ L with hexane. In both cases, 1  $\mu$ L of hexane (containing the analytes) was analyzed by GC-MS (Varian Saturn 3800 GC attached to a Varian 2000 MS). The sample was injected into a HP5ms column 30m x 250  $\mu$ M x 0.25  $\mu$ M thickness (Agilent). Helium (ultra purity) at a flow rate 1.0 ml/min was used as a carrier gas. The oven temperature was first kept constant at 50° C for 1 min, and then increased to 220° C at the increment of 10° C/min, and finally held at this temperature for 10 min. The injector and transfer line temperatures were set at 200° C and 250°C, respectively. Because levopimaradiene, abietadiene, and sandaracopimaradiene are not commercially available, taxadiene, a diterpenoid possessing the same molecular mass as levopimaradiene, abietadiene, sandaracopimaradiene was used to construct a calibration curve for the peak areas obtained from the GC-MS.

**Supplementary Table 8. Custom oligonucleotides used for MEP pathway construction**

|    |                    |                                                                                                     |
|----|--------------------|-----------------------------------------------------------------------------------------------------|
| 1  | dxsNdeI(s)         | CGGCATATGAGTTTTGATATTGCCAAATACCCG                                                                   |
| 2  | dxsNheI(a)         | CGGCTAGCTTATGCCAGCCAGGCCTTGATTTTG                                                                   |
| 3  | idiNheI (s)        | CGCGGCTAGCGAAGGAGATATACATATGCAAACGGA<br>ACACGTCATTTTATTG                                            |
| 4  | idiEcoRI(a)        | CGGAATTCGCTCACAACCCCGGCAAATGTCCG                                                                    |
| 5  | ispDFEcoRI(s)      | GCGAATTCGAAGGAGATATACATATGGCAACCACTCA<br>TTTGGATGTTTG                                               |
| 6  | ispDFXhoI(a)       | GCGCTCGAGTCATTTTGTTGCCTTAATGAGTAGCGCC                                                               |
| 7  | dxsidiispDFNcoI(s) | TAAACCATGGGTTTTGATATTGCCAAATACCCG                                                                   |
| 8  | dxsidiispDFKpnI(a) | CGGGGTACCTCATTTTGTTGCCTTAATGAGTAGCGC                                                                |
| 10 | KmFRPScaI(a)       | GACGAGTACTGAACGTCGGAATTGATCCGTCGAC                                                                  |
| 11 | KmFRPSacI(s)       | GACGGAGCTCGAGCAATAACTAGCATAACCCCTTGG<br>GGCCTCTAAACGGGTCTTGAGGGGTTTTTTGCTTGTG<br>TAGGCTGGAGCTGCTTCG |
| 12 | IntTrc(s)          | ATGACGATTTTTGATAATTATGAAGTGTGGTTTTGTCAT<br>TGGCATCCGCTTACAGACAAGCTGTG                               |
| 13 | Int(a)             | TTAGCGACGAAACCCGTAATACACTTCGTTCCAGCGC<br>AGCCGACGTCGGAATTGATCCGTCGAC                                |
| 14 | CS173blaclqEagI(s) | GTTCGGCCG AGCTGTGACCGTCTCCGGGAGC                                                                    |
| 15 | CS174brrnBBamHI(a) | GTTCACCGACAAACAACAGATAAAACGAAA                                                                      |

**Supplementary Table 9. Custom oligonucleotides used for LPS mutagenesis**

| Mutation | 5'-3' Sequence                         |
|----------|----------------------------------------|
| F-C618N  | CGTACGCAAAAACCTCTAACCTGGCCGTAATCCTGG   |
| R-C618N  | CCAGGATTACGGCCAGGTTAGAGGTTTTTGCGTACG   |
| F-L619F  | GCAAAAACCTCTTGCTTCGCCGTAATCCTGGACGATC  |
| R-L619F  | GATCGTCCAGGATTACGGCGAAGCAAGAGGTTTTTGC  |
| F-L696Q  | GTAAAGTTTGGGAGGGCCAGCTGGCCTCCTATAC     |
| R-L696Q  | GTATAGGAGGCCAGCTGGCCCTCCCAAACCTTTAC    |
| F-K723S  | GTATGTTCGAGAACGCTAGTGTTAGCATCGCGCTGG   |
| R-K723S  | CCAGCGCGATGCTAACACTAGCGTTCTCGACATAC    |
| F-A727S  | CTAAAGTTAGCATCTCGCTGGCGACCGTTGTTCTG    |
| R-A727S  | CAGAACAACGGTCCGCGAGATGCTAACTTTAG       |
| F-A729G  | CTAAAGTTAGCATCGCGCTGGGGACCGTTGTTCTG    |
| R-A729G  | CAGAACAACGGTCCCAGCGCGATGCTAACTTTAG     |
| F-V731L  | CATCGCGCTGGCGACCCTTGTCTGAACTC          |
| R-V731L  | GAGTTCAGAACAAGGGTCCGCGCGATG            |
| F-N769A  | CCGGCCGTCTGATTGCCGACACCAAACCTATCAG     |
| R-N769A  | CTGATAGGTTTTTGGTGTCCGCAATCAGACGGCCGG   |
| F-E777A  | CCAAAACCTATCAGGCTGCACGTAACCGTGG        |
| R-E777A  | CCACGGTTACGTGCAGCCTGATAGGTTTTGG        |
| F-N838E  | CGTCGTCTGCTGTTCCGAGACCGCGCGTGTAATGC    |
| R-N838E  | GCATTACACGCGCGGTCTCGAACAGCAGACGACG     |
| F-G854T  | GTACCGCGATGGCTTCACCATCAGCGATAAAGAAATG  |
| R-G854T  | CATTTCTTTATCGCTGATGGTGAAGCCATCGCGGTAC  |
| F-I855L  | CCGCGATGGCTTCGGCCTCAGCGATAAAG          |
| R-I855L  | CTTTATCGCTGAGGCCGAAGCCATCGCGG          |
| F-M593A  | GTCAGCGCCCGGTTGAAGCGTACTTTTTCTGTTGCAG  |
| R-M593A  | CTGCAACAGAAAAGTACGCTTCAACCGGGGCGCTGAC  |
| F-M593C  | GTCAGCGCCCGGTTGAATGTTACTTTTTCTGTTGCAG  |
| R-M593C  | CTGCAACAGAAAAGTAAACATTCAACCGGGGCGCTGAC |
| F-M593D  | GTCAGCGCCCGGTTGAAGACTACTTTTTCTGTTGCAG  |
| R-M593D  | CTGCAACAGAAAAGTAGTCTTCAACCGGGGCGCTGAC  |
| F-M593E  | GTCAGCGCCCGGTTGAAGAGTACTTTTTCTGTTGCAG  |
| R-M593E  | CTGCAACAGAAAAGTACTCTTCAACCGGGGCGCTGAC  |
| F-M593F  | GTCAGCGCCCGGTTGAATTTTACTTTTTCTGTTGCAG  |
| R-M593F  | CTGCAACAGAAAAGTAAAATTCAACCGGGGCGCTGAC  |
| F-M593G  | GTCAGCGCCCGGTTGAAGGGTACTTTTTCTGTTGCAG  |
| R-M593G  | CTGCAACAGAAAAGTACCCTTCAACCGGGGCGCTGAC  |
| F-M593H  | FGTCAGCGCCCGGTTGAACACTACTTTTTCTGTTGCAG |
| R-M593H  | CTGCAACAGAAAAGTAGTGTTCAACCGGGGCGCTGAC  |
| F-M593I  | GTCAGCGCCCGGTTGAAATCTACTTTTTCTGTTGCAG  |
| R-M593I  | CTGCAACAGAAAAGTAGATTTCAACCGGGGCGCTGAC  |

|         |                                       |
|---------|---------------------------------------|
| F-M593K | GTCAGCGCCCGGTTGAAAAATACTTTTTCTGTTGCAG |
| R-M593K | CTGCAACAGAAAAGTATTTTTCAACCGGGCGCTGAC  |
| F-M593L | GTCAGCGCCCGGTTGAATTGTACTTTTTCTGTTGCAG |
| R-M593L | CTGCAACAGAAAAGTACAATTCAACCGGGCGCTGAC  |
| F-M593N | GTCAGCGCCCGGTTGAAAATACTTTTTCTGTTGCAG  |
| R-M593N | CTGCAACAGAAAAGTAGTTTTCAACCGGGCGCTGAC  |
| F-M593Q | GTCAGCGCCCGGTTGAACAGTACTTTTTCTGTTGCAG |
| R-M593Q | CTGCAACAGAAAAGTACTGTTCAACCGGGCGCTGAC  |
| F-M593P | GTCAGCGCCCGGTTGAACCGTACTTTTTCTGTTGCAG |
| R-M593P | CTGCAACAGAAAAGTACGGTTCAACCGGGCGCTGAC  |
| F-M593R | GTCAGCGCCCGGTTGAAAGGTACTTTTTCTGTTGCAG |
| R-M593R | CTGCAACAGAAAAGTACCTTTCAACCGGGCGCTGAC  |
| F-M593S | GTCAGCGCCCGGTTGAATCGTACTTTTTCTGTTGCAG |
| R-M593S | CTGCAACAGAAAAGTACGATTCAACCGGGCGCTGAC  |
| F-M593T | GTCAGCGCCCGGTTGAAACGTACTTTTTCTGTTGCAG |
| R-M593T | CTGCAACAGAAAAGTACGTTTTCAACCGGGCGCTGAC |
| F-M593V | GTCAGCGCCCGGTTGAAGTGTACTTTTTCTGTTGCAG |
| R-M593V | CTGCAACAGAAAAGTACACTTCAACCGGGCGCTGAC  |
| F-M593W | GTCAGCGCCCGGTTGAATGGTACTTTTTCTGTTGCAG |
| R-M593W | CTGCAACAGAAAAGTACCATTCAACCGGGCGCTGAC  |
| F-M593Y | GTCAGCGCCCGGTTGAATATTACTTTTTCTGTTGCAG |
| R-M593Y | CTGCAACAGAAAAGTAATATTCAACCGGGCGCTGAC  |
| F-A620C | CCTCTTGCCTGTGCGTAATCCTGGACG           |
| R-A620C | CGTCCAGGATTACGCACAGGCAAGAGG           |
| F-A620D | CCTCTTGCCTGGACGTAATCCTGGACG           |
| R-A620D | CGTCCAGGATTACGTCCAGGCAAGAGG           |
| F-A620E | CCTCTTGCCTGGAAGTAATCCTGGACG           |
| R-A620E | CGTCCAGGATTACTTCCAGGCAAGAGG           |
| F-A620F | CCTCTTGCCTGTTGTAATCCTGGACG            |
| R-A620F | CGTCCAGGATTACGAACAGGCAAGAGG           |
| F-A620G | CCTCTTGCCTGGGCGTAATCCTGGACG           |
| R-A620G | CGTCCAGGATTACGCCCAGGCAAGAGG           |
| F-A620H | CCTCTTGCCTGCACGTAATCCTGGACG           |
| R-A620H | CGTCCAGGATTACGTGCAGGCAAGAGG           |
| F-A620I | CCTCTTGCCTGATCGTAATCCTGGACG           |
| R-A620I | CGTCCAGGATTACGATCAGGCAAGAGG           |
| F-A620K | CCTCTTGCCTGAAAGTAATCCTGGACG           |
| R-A620K | CGTCCAGGATTACTTTCAGGCAAGAGG           |
| F-A620L | CCTCTTGCCTGCTCGTAATCCTGGACG           |
| R-A620L | CGTCCAGGATTACGAGCAGGCAAGAGG           |
| F-A620M | CCTCTTGCCTGATGGTAATCCTGGACG           |
| R-A620M | CGTCCAGGATTACCATCAGGCAAGAGG           |
| F-A620N | CCTCTTGCCTGAACGTAATCCTGGACG           |
| R-A620N | CGTCCAGGATTACGTTTCAGGCAAGAGG          |
| F-A620P | CCTCTTGCCTGCCCCTAATCCTGGACG           |
| R-A620P | CGTCCAGGATTACGGGCAGGCAAGAGG           |

F-A620Q  
R-A620Q  
F-A620R  
R-A620R  
F-A620S  
R-A620S  
F-A620T  
R-A620T  
F-A620V  
R-A620V  
F-A620W  
R-A620W  
F-A620Y  
R-A620Y  
F-Y700A  
R-Y700A  
F-Y700C  
R-Y700C  
F-Y700D  
R-Y700D  
F-Y700E  
R-Y700E  
F-Y700F  
R-Y700F  
F-Y700G  
R-Y700G  
F-Y700H  
R-Y700H  
F-Y700I  
R-Y700I  
F-Y700K  
R-Y700K  
F-Y700L  
R-Y700L  
F-Y700M  
R-Y700M  
F-Y700N  
R-Y700N  
F-Y700P  
R-Y700P  
F-Y700Q  
R-Y700Q  
F-Y700R  
RY700R  
F-Y700S  
R-Y700S

CCTCTTGCCTGCAAGTAATCCTGGACG  
CGTCCAGGATTACTTGCAGGCAAGAGG  
CCTCTTGCCTGCGCGTAATCCTGGACG  
CGTCCAGGATTACGCGCAGGCAAGAGG  
CCTCTTGCCTGTCCGTAATCCTGGACG  
CGTCCAGGATTACGGACAGGCAAGAGG  
CCTCTTGCCTGACCGTAATCCTGGACG  
CGTCCAGGATTACGGTCAGGCAAGAGG  
CCTCTTGCCTGGTCGTAATCCTGGACG  
CGTCCAGGATTACGACCAGGCAAGAGG  
CCTCTTGCCTGTGGGTAATCCTGGACG  
CGTCCAGGATTACCCACAGGCAAGAGG  
CCTCTTGCCTGTACGTAATCCTGGACG  
CGTCCAGGATTACGTACAGGCAAGAGG  
GGCCTGCTGGCCTCCGCTACCAAGGAAGCG  
CGCTTCCTTGGTAGCGGAGGCCAGCAGGCC  
GGCCTGCTGGCCTCCTGTACCAAGGAAGCG  
CGCTTCCTTGGTACAGGAGGCCAGCAGGCC  
GGCCTGCTGGCCTCCGATACCAAGGAAGCG  
CGCTTCCTTGGTATCGGAGGCCAGCAGGCC  
GGCCTGCTGGCCTCCGAAACCAAGGAAGCG  
CGCTTCCTTGGTTTTCGGAGGCCAGCAGGCC  
GGCCTGCTGGCCTCCTTTACCAAGGAAGCG  
CGCTTCCTTGGTAAAGGAGGCCAGCAGGCC  
GGCCTGCTGGCCTCCGGTACCAAGGAAGCG  
CGCTTCCTTGGTACCGGAGGCCAGCAGGCC  
GGCCTGCTGGCCTCCCATACCAAGGAAGCG  
CGCTTCCTTGGTATGGGAGGCCAGCAGGCC  
GGCCTGCTGGCCTCCATTACCAAGGAAGCG  
CGCTTCCTTGGTAATGGAGGCCAGCAGGCC  
GGCCTGCTGGCCTCCAAAACCAAGGAAGCG  
CGCTTCCTTGGTTTTGGAGGCCAGCAGGCC  
GGCCTGCTGGCCTCCTTAACCAAGGAAGCG  
CGCTTCCTTGGTTAAGGAGGCCAGCAGGCC  
GGCCTGCTGGCCTCCATGACCAAGGAAGCG  
CGCTTCCTTGGTCATGGAGGCCAGCAGGCC  
GGCCTGCTGGCCTCCAATACCAAGGAAGCG  
CGCTTCCTTGGTATTGGAGGCCAGCAGGCC  
GGCCTGCTGGCCTCCCCTACCAAGGAAGCG  
CGCTTCCTTGGTAGGGGAGGCCAGCAGGCC  
GGCCTGCTGGCCTCCGAAACCAAGGAAGCG  
CGCTTCCTTGGTTTTCGGAGGCCAGCAGGCC  
GGCCTGCTGGCCTCCCGTACCAAGGAAGCG  
CGCTTCCTTGGTACGGGAGGCCAGCAGGCC  
GGCCTGCTGGCCTCCTCTACCAAGGAAGCG  
CGCTTCCTTGGTAGAGGAGGCCAGCAGGCC

|         |                                |
|---------|--------------------------------|
| F-Y700T | GGCCTGCTGGCCTCCACTACCAAGGAAGCG |
| R-Y700T | CGCTTCCTTGGTAGTGGAGGCCAGCAGGCC |
| F-Y700V | GGCCTGCTGGCCTCCGTTACCAAGGAAGCG |
| R-Y700V | CGCTTCCTTGGTAACGGAGGCCAGCAGGCC |
| F-Y700W | GGCCTGCTGGCCTCCTGGACCAAGGAAGCG |
| R-Y700W | CGCTTCCTTGGTCCAGGAGGCCAGCAGGCC |

---

The letter F and R in the beginning of each mutagenic oligonucleotide indicates 'forward' and 'reverse' sequence, respectively.

## REFERENCES

1. Cyr A, Wilderman PR, Determan M, & Peters RJ (2007) A modular approach for facile biosynthesis of labdane-related diterpenes. *J Am Chem Soc* 129(21):6684-6685.
2. Martin DM, Faldt J, & Bohlmann J (2004) Functional characterization of nine Norway Spruce TPS genes and evolution of gymnosperm terpene synthases of the TPS-d subfamily. *Plant Physiol* 135(4):1908-1927.
3. Facchini PJ & Chappell J (1992) Gene family for an elicitor-induced sesquiterpene cyclase in tobacco. *Proc Natl Acad Sci U S A* 89(22):11088-11092.
4. Schepmann HG, Pang J, & Matsuda SP (2001) Cloning and characterization of Ginkgo biloba levopimaradiene synthase which catalyzes the first committed step in ginkgolide biosynthesis. *Arch Biochem Biophys* 392(2):263-269.
5. Hefner J, Ketchum REB, & Croteau R (1998) Cloning and functional expression of a cDNA encoding geranylgeranyl diphosphate synthase from *Taxus canadensis* and assessment of the role of this prenyltransferase in cells induced for Taxol production. (Translated from English) *Archives of Biochemistry and Biophysics* 360(1):62-74 (in English).
6. Leonard E & Koffas MA (2007) Engineering of artificial plant cytochrome P450 enzymes for synthesis of isoflavones by *Escherichia coli*. *Appl Environ Microbiol* 73(22):7246-7251.
7. Cunningham FX, Jr., Sun Z, Chamovitz D, Hirschberg J, & Gantt E (1994) Molecular structure and enzymatic function of lycopene cyclase from the cyanobacterium *Synechococcus* sp strain PCC7942. *Plant Cell* 6(8):1107-1121.
8. Santos CNS & Stephanopoulos G (2008) Melanin-based high-throughput screen for L-tyrosine production in *Escherichia coli*. *Applied and environmental microbiology* 74(4):1190.
9. Lerner CG & Inouye M (1990) Low copy number plasmids for regulated low-level expression of cloned genes in *Escherichia coli* with blue/white insert screening capability. *Nucleic Acids Res* 18(15):4631.
10. Tyo KE, Ajikumar PK, & Stephanopoulos G (2009) Stabilized gene duplication enables long-term selection-free heterologous pathway expression. *Nat Biotechnol* 27(8):760-765.
11. Datsenko KA & Wanner BL (2000) One-step inactivation of chromosomal genes in *Escherichia coli* K-12 using PCR products. *Proc Natl Acad Sci U S A* 97(12):6640-6645.
